# Supplementary material for: Exopolysaccharide Carbohydrate Structure and Biofilm Formation by Rhizobium leguminosarum bv. trifolii Strains Inhabiting Nodules of Trifolium repens Growing on an Old Zn–Pb–Cd-Polluted Waste Heap Area
Source: MDPI journal article supplement (doi:10.3390/ijms22062808), 2021-03-10
Supplement: s1 [file s1]

**Figure S1.** Mass spectra of peaks of not identified carbohydrate-type compounds detected by GC-MS analysis of exopolysaccharides of *R. leguminosarum* bv. *trifolii* isolated from root nodules of *T. repens* growing on 100-yrs old Zn-Pb waste heap Bolesław (WH) and non-polluted reference grassland Bolestraszyce (R) not exposed (control) and exposed to 0.05 mM and 1.0 mM Cd, 0.5 mM and 2.5 mM Zn and 0.5 mM and 2.5 mM Pb. Mass spectra of peaks with particular retention indices (*I*) are marked with letters (A-H) as follows: A, mass spectrum of a peak with *I*=1883; B, mass spectrum of a peak with *I*=1896; C, mass spectrum of a peak with *I*=1912; D, mass spectrum of a peak with *I*=1930; E, mass spectrum of a peak with *I*=1937; F, mass spectrum of a peak with *I*=1952; G, mass spectrum of a peak with *I*=1955; H, mass spectrum of a peak with *I*=1958.

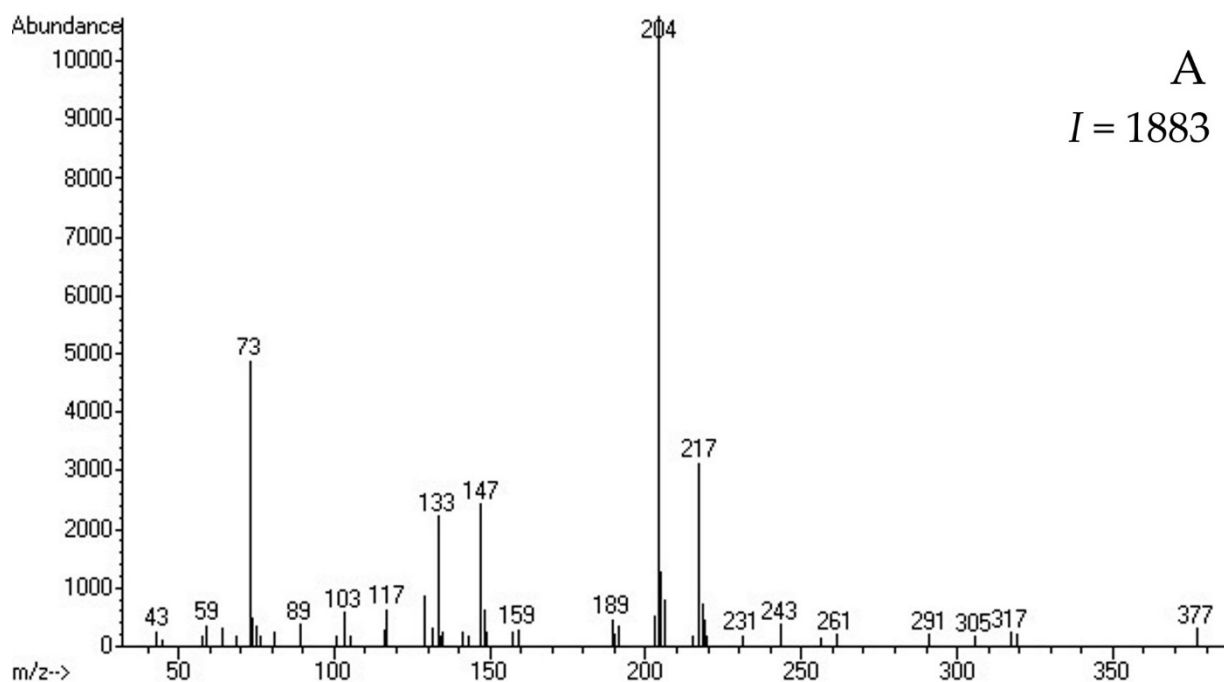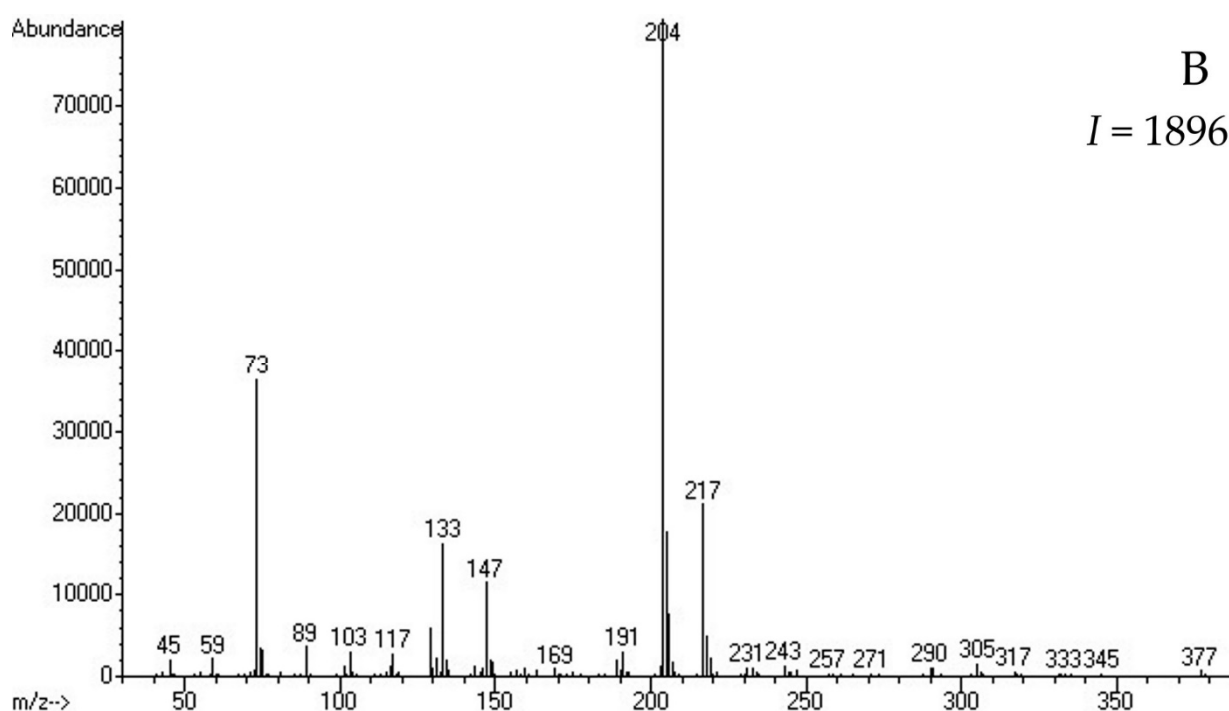

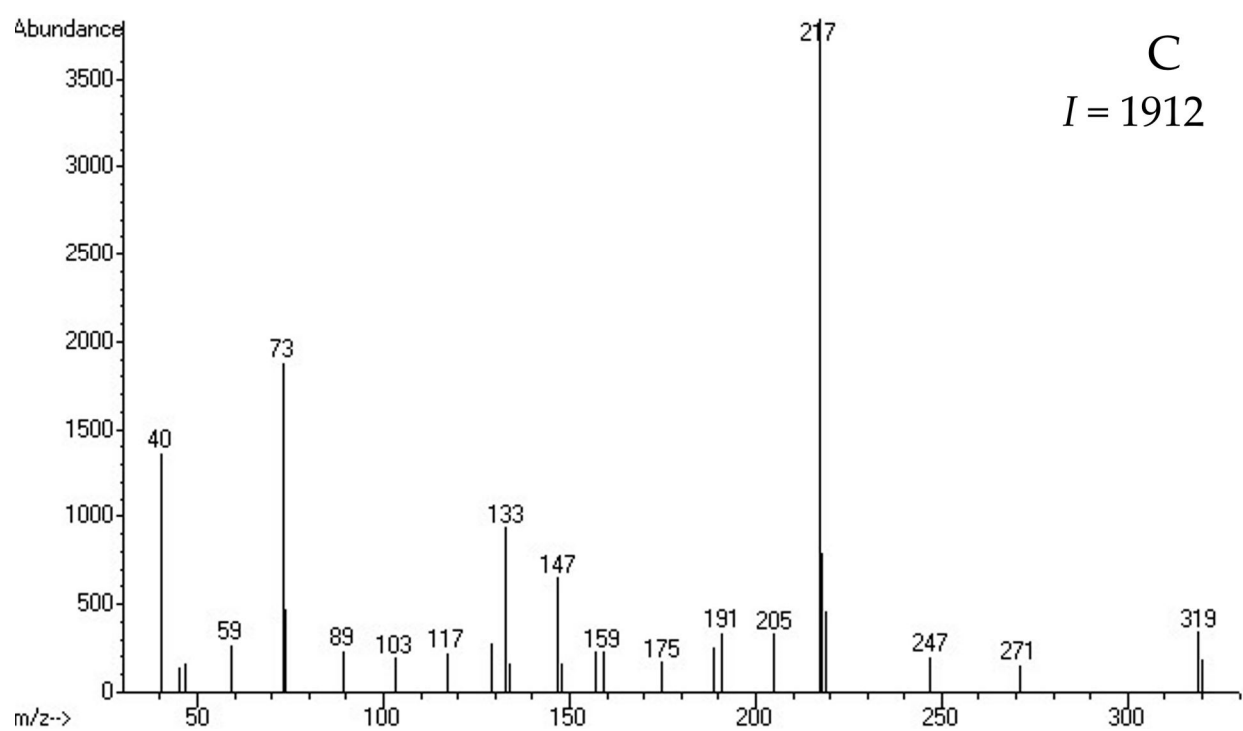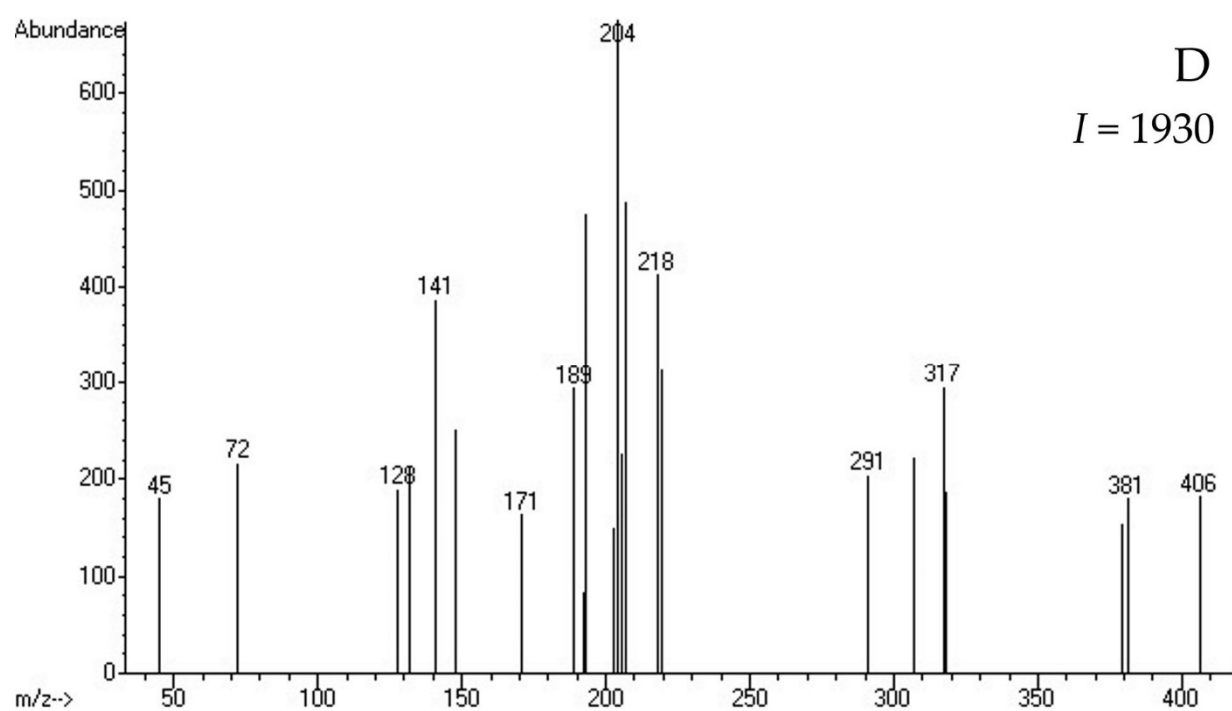

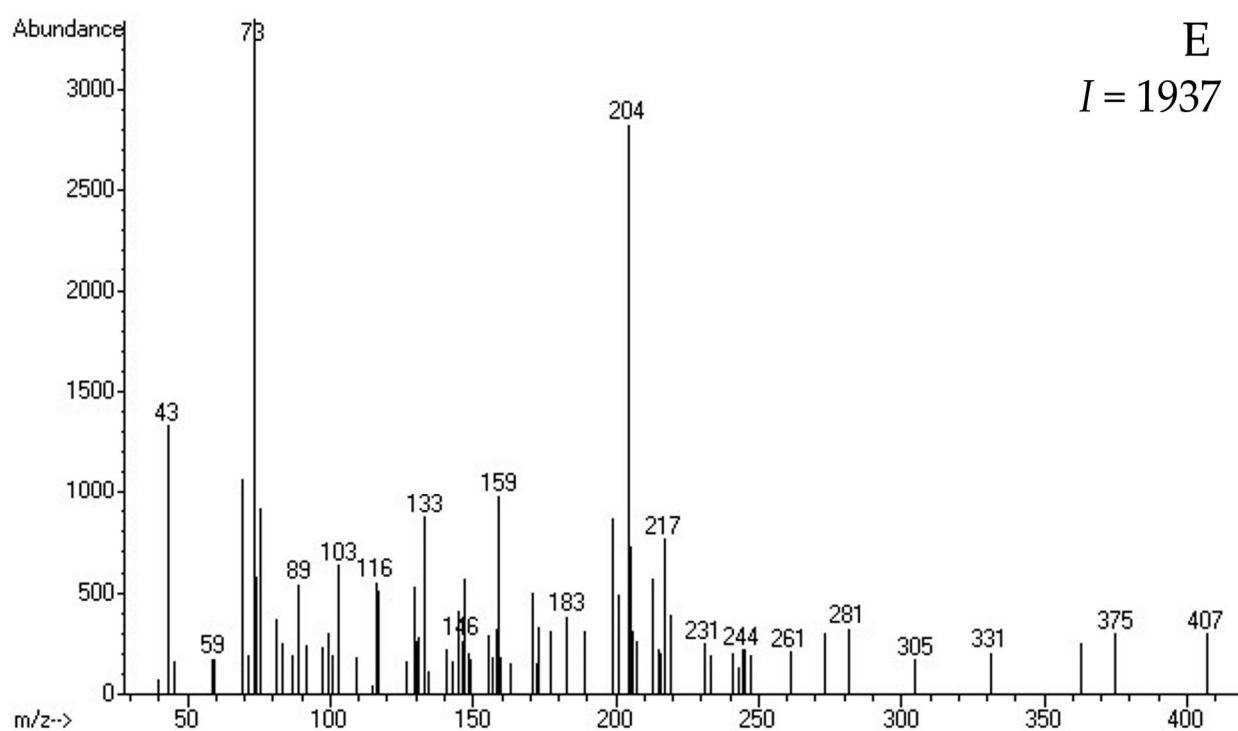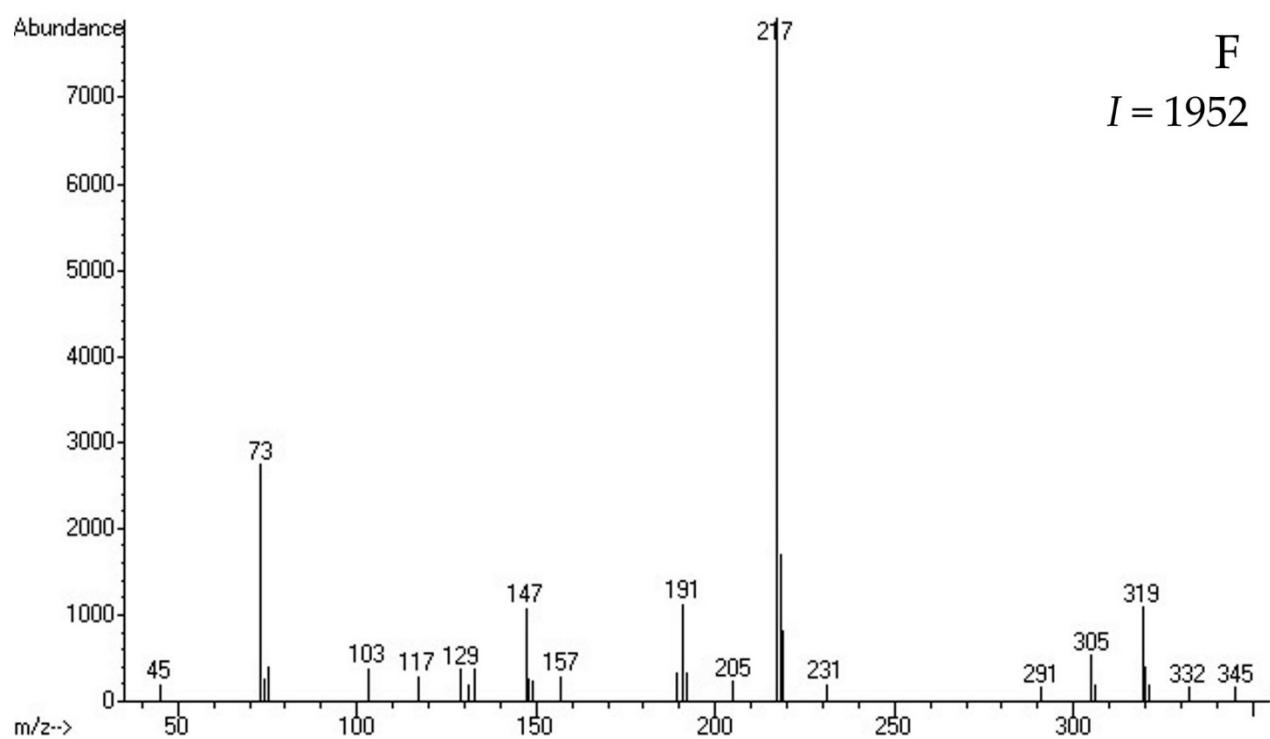

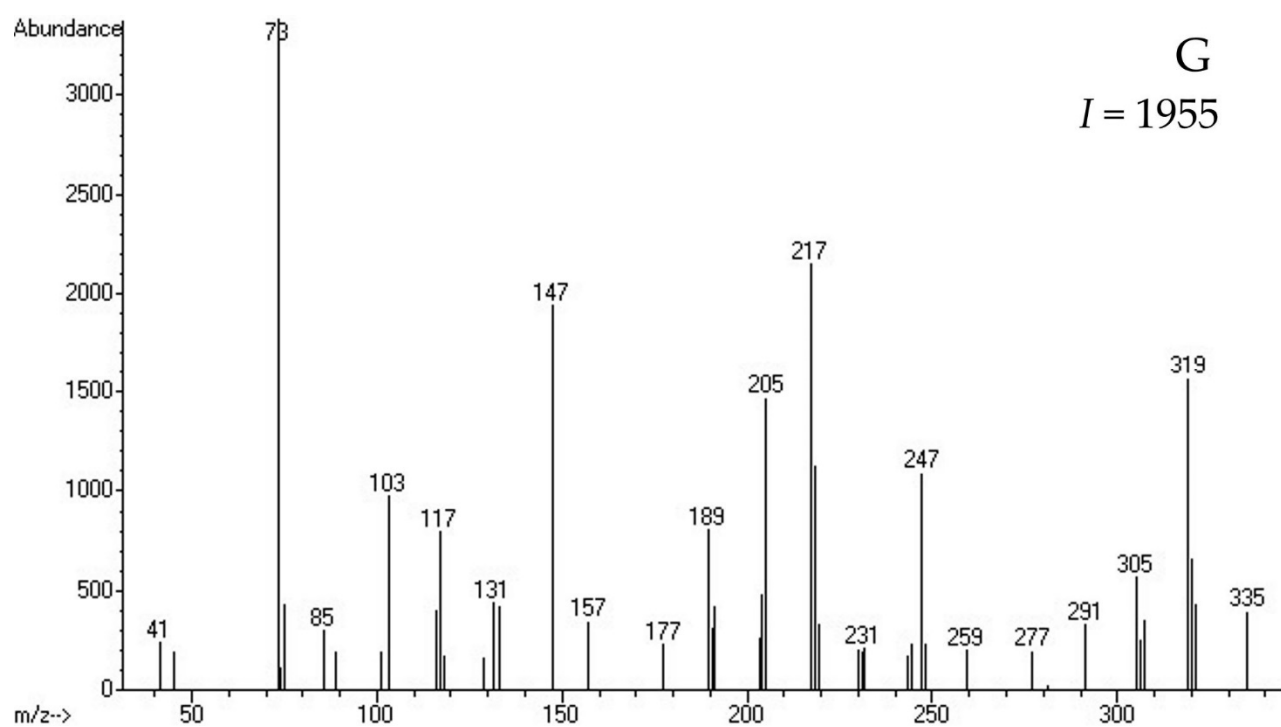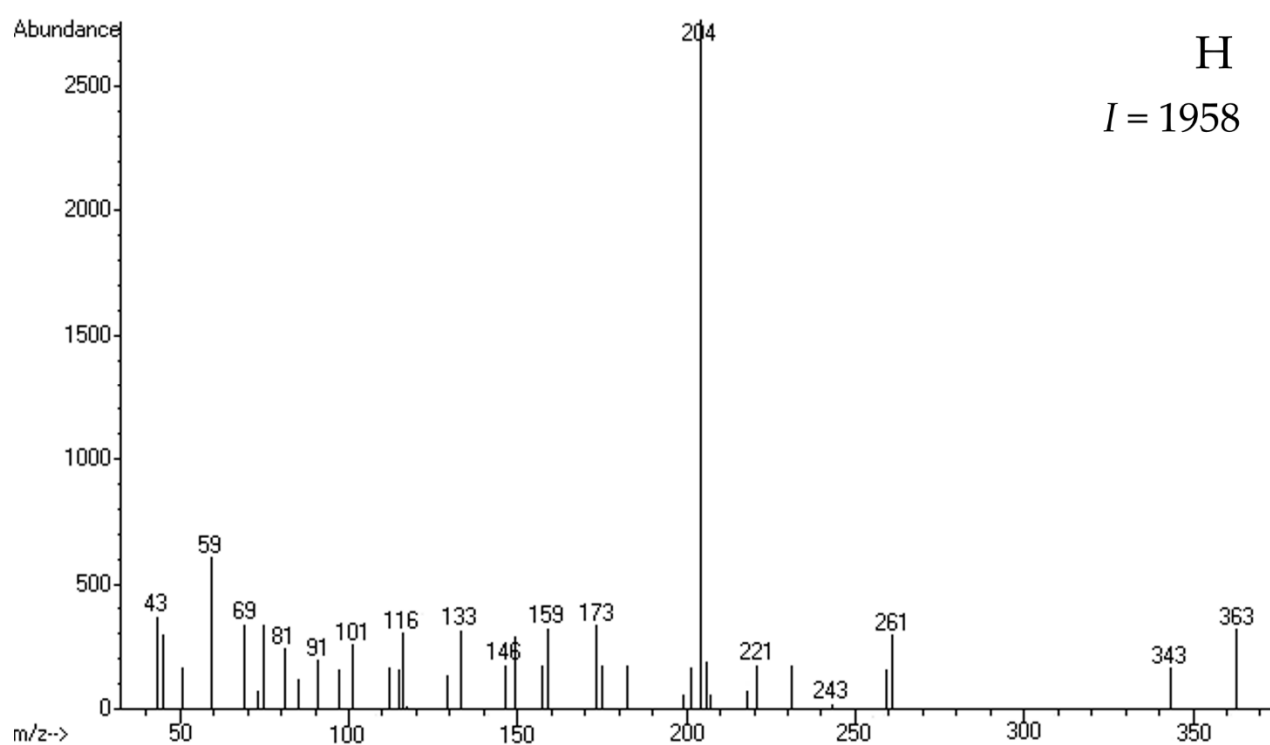

**Table S1.** Mean retention times ( $t_{Rmean}$ ), determined experimentally ( $I$ ) and reference ( $I_{REF}$ ) indices of retention, and the mass to charge ratio ( $m/z$ ) of compounds detected in exopolysaccharides of *R. leguminosarum* bv. *trifolii* isolated from root nodules of *T. repens* growing on 100-yr old Zn-Pb waste heap Bolesław (WH) and non-polluted reference grassland Bolestraszyce (R) not exposed (control) and exposed to 0.05 mM and 1.0 mM Cd, 0.5 mM and 2.5 mM Zn and 0.5 mM and 2.5 mM Pb.

| Compound                                                                            | $t_{Rmean}$ | $I$  | $I_{REF}$      | $m/z$       |
|-------------------------------------------------------------------------------------|-------------|------|----------------|-------------|
| $\alpha$ -D,L-lyxopyranose                                                          | 19.175      | 1597 | 1603           | 217,73,204  |
| $\alpha$ -D-arabinopyranose                                                         | 19.986      | 1609 | 1610           | 204,73,133  |
| D-rhamnose                                                                          | 23.328      | 1656 | 1657           | 204,73,40   |
| L-rhamnose monohydrate                                                              | 23.683      | 1661 | standard       | 204,73,191  |
| levoglucosan                                                                        | 27.724      | 1716 | 1724           | 73,217,204  |
| 6-deoxy-D-glucose                                                                   | 35.031      | 1807 | 1808           | 204,73,217  |
| methyl $\alpha$ -D-mannopyranoside                                                  | 36.108      | 1820 | 1822           | 204,73,217  |
| galactofuranoside                                                                   | 37.221      | 1833 | 1830           | 217,73,147  |
| $\alpha$ -D-mannopyranose                                                           | 38.252      | 1846 | 1844           | 204,73,217  |
| D-fructose                                                                          | 38.685      | 1851 | standard       | 204,73,217  |
| $\beta$ -D-galactopyranoside                                                        | 39.899      | 1865 | 1865           | 204,73,217  |
| $\alpha$ -D-galactofuranose                                                         | 40.181      | 1869 | 1867           | 217,73,319  |
| $\alpha$ -D-mannofuranose                                                           | 40.619      | 1874 | 1874           | 217,73,147  |
| $\alpha$ -glucofuranose                                                             | 41.209      | 1881 | 1880           | 204,217,73  |
| NI ( $\alpha$ -talofuranose/ $\beta$ -fructopyranose)                               | 41.414      | 1883 | 1882/1887      | 73,217,147  |
| NI ( $\alpha$ -D-fructopyranose/ $\alpha$ -D-galactopyranose/ $\beta$ -D-galactose) | 42.514      | 1896 | 1902/1899/1900 | 217,73,147  |
| NI ( $\gamma$ -glucuronolactone/ $\alpha$ -D-fructopyranose)                        | 43.273      | 1905 | standard       | 204,73,217  |
| $\alpha$ -D-glucopyranoside                                                         | 43.847      | 1912 | 1902/1913      | 217,73,147  |
| $\alpha$ -D-glucopyranose                                                           | 44.492      | 1919 | 1922           | 204,73,191  |
| NI ( $\delta$ -tagatose/galacturonic acid)                                          | 45.135      | 1927 | 1930           | 204,73,217  |
| D-glucose                                                                           | 45.419      | 1930 | 1934/1936      | 204,191,148 |
| NI ( $\delta$ -tagatose/galacturonic acid)                                          | 45.742      | 1934 | standard       | 243,73,204  |
| $\beta$ -D-galactopyranose                                                          | 46.006      | 1937 | 1934/1936      | 204,133,217 |
| $\beta$ -D-mannopyranose                                                            | 46.282      | 1940 | 1941           | 204,73,217  |
| $\beta$ -talopyranose                                                               | 46.560      | 1943 | 1942           | 204,217,73  |
| NI ( $\beta$ -D-glucopyranuronic acid/ gulonic acid/ sedoheptulose)                 | 46.949      | 1948 | 1943           | 243,73,204  |
| NI ( $\beta$ -D-glucopyranuronic acid/ gulonic acid/ glucitol)                      | 47.280      | 1952 | 1957/1958/1954 | 133,204,73  |
| NI ( $\beta$ -D-glucopyranuronic acid/ gulonic acid/ galactonic acid)               | 47.532      | 1955 | 1957/1958/1954 | 73,217,147  |
| NI ( $\beta$ -D-glucopyranuronic acid/ gulonic acid/ gluconic acid)                 | 47.798      | 1958 | 1957/1958/1954 | 204,117,43  |
| glucuronic acid                                                                     | 48.747      | 1969 | 1972           | 319,73,205  |
| D-glucuronic acid                                                                   | 49.174      | 1974 | 1981           | 319,73,205  |
| $\beta$ -D-glucopyranose                                                            | 53.635      | 2026 | 2031           | 204,73,191  |
| galactonic acid                                                                     | 54.798      | 2040 | 2039           | 204,73,191  |
| gluconic acid                                                                       | 55.073      | 2043 | 2043           | 243,40,73   |
| glucuronic acid                                                                     | 56.117      | 2056 | 2056           | 191,73,204  |
| myo-inositol                                                                        | 59.511      | 2096 | standard       | 73,147,205  |
| N-acetyl-D-glucosamine                                                              | 62.003      | 2126 | standard       | 217,73,204  |
|                                                                                     | 62.866      | 2136 | 2136           | 173,73,131  |

Not identified compounds were marked as NI, and in parenthesis a possible quality identification was proposed.

**Table S2.** Frequencies (*f*), the percent composition (% C), and concentration of identified carbohydrates in exopolysaccharides of *R. leguminosarum* bv. *trifolii* isolated from root nodules of *T. repens* growing on 100-yr old Zn-Pb waste heap Bolesław (WH) and non-polluted reference grassland Bolestraszyce (R) not exposed (control) and exposed to 0.05 mM and 1.0 mM Cd, 0.5 mM and 2.5 mM Zn and 0.5 mM and 2.5 mM Pb.

| Carbohydrate               | <i>f</i> (%) | % C          | Mean % C | Median % C | Concentration (µg mL <sup>-1</sup> ) | Mean concentration |
|----------------------------|--------------|--------------|----------|------------|--------------------------------------|--------------------|
| α-D,L-lyxopyranose         | 1.22         | 0.25         | 0.25     | 0.25       | 15.13                                | 15.13              |
| α-D-arabinopyranose        | 9.76         | 2.56-0.04    | 0.55     | 0.205      | 101.18-17.78                         | 31.66              |
| D-rhamnose                 | 1.22         | 0.04         | 0.04     | 0.04       | 6.69                                 | 6.69               |
| L-rhamnose monohydrate     | 2.44         | 0.13-0.10    | 0.115    | 0.115      | 12.02-6.41                           | 9.22               |
| levoglucosan               | 10.98        | 2.58-0.67    | 1.25     | 1.19       | 19.65-17.59                          | 18.55              |
| 6-deoxy-D-glucose          | 7.32         | 4.82-2.19    | 3.25     | 3.115      | 60.21-43.27                          | 54.36              |
| methyl α-D-mannopyranoside | 69.51        | 3.86-0.07    | 1.58     | 1.6        | 102.31-18.03                         | 46.89              |
| galactofuranoside          | 13.41        | 3.70-0.03    | 0.70     | 0.31       | 21.94-12.61                          | 18.61              |
| α-D-mannopyranose          | 57.32        | 3.84-0.05    | 0.28     | 0.11       | 23.10-18.06                          | 19.76              |
| D-fructose                 | 63.41        | 2.00-0.05    | 0.35     | 0.16       | 49.80-11.64                          | 17.94              |
| β-D-galactopyranoside      | 40.24        | 46.04-0.05   | 2.98     | 0.73       | 194.15-12.90                         | 45.43              |
| α-D-galactofuranose        | 2.44         | 0.09-0.05    | 0.07     | 0.07       | 19.28-18.80                          | 19.04              |
| α-D-mannofuranose          | 7.32         | 2.52-0.09    | 0.58     | 0.2        | 18.05-11.70                          | 17.57              |
| α-glucufuranose            | 10.98        | 1.14-0.07    | 0.43     | 0.45       | 24.33-17.50                          | 20.11              |
| D-galactose                | 24.39        | 15.42-0.05   | 4.28     | 0.535      | 288.64-18.52                         | 75.58              |
| α-D-glucopyranoside        | 84.15        | 16.49-0.11   | 2.26     | 1.05       | 365.25-17.49                         | 39.83              |
| α-D-glucopyranose          | 7.32         | 4.88-3.75    | 4.46     | 4.585      | 92.40-49.74                          | 70.86              |
| D-glucose                  | 34.15        | 5.39-0.05    | 1.39     | 0.295      | 124.85-17.71                         | 34.34              |
| β-D-galactopyranose        | 59.76        | 5.8-0.06     | 0.50     | 0.22       | 158.63-15.51                         | 28.39              |
| β-D-mannopyranose          | 18.29        | 1.00-0.07    | 0.20     | 0.11       | 29.83-17.84                          | 19.79              |
| β-talopyranose             | 32.93        | 11.54-0.1    | 3.70     | 2.79       | 297.57-18.69                         | 83.46              |
| sedoheptulose              | 24.39        | 10.96-0.04   | 2.68     | 0.85       | 300.52-11.17                         | 82.98              |
| glucitol                   | 98.78        | 100.00-53.86 | 90.50    | 91.08      | 1816.58-34.37                        | 731.57             |
| β-D-glucopyranose          | 23.17        | 10.31-0.36   | 4.59     | 5.29       | 42.22-17.68                          | 24.79              |
| galactonic acid            | 25.61        | 5.42-0.09    | 0.51     | 0.15       | 4346.71-42.89                        | 341.89             |
| gluconic acid              | 12.20        | 1.77-0.04    | 0.71     | 0.62       | 71.37-45.35                          | 51.90              |
| glucuronic acid            | 20.73        | 1.02-0.04    | 0.31     | 0.18       | 155.82-38.68                         | 74.87              |
| D-glucuronic acid          | 1.22         | 0.08         | 0.08     | 0.08       | 41.91                                | 41.91              |
| myo-inositol               | 1.22         | 0.013        | 0.13     | 0.13       | 26.93                                | 26.93              |
| N-acetyl-D-glucosamine     | 2.44         | 0.09-0.08    | 0.085    | 0.085      | 19.86-17.52                          | 18.69              |

Figure S2. Standard curves of D-(-)-fructose, L-rhamnose monohydrate, D-(+)-galactose, D-glucuronic acid, D-(+)-glucose, *myo*-inositol, D-(+)-galacturonic acid monohydrate, D-(+)-xylose monosaccharide solutions prepared as a mixture of particular standard monosaccharides in concentrations as follows 10  $\mu\text{g mL}^{-1}$ , 50  $\mu\text{g mL}^{-1}$ , 100  $\mu\text{g mL}^{-1}$ , 200  $\mu\text{g mL}^{-1}$ , and 500  $\mu\text{g mL}^{-1}$ .

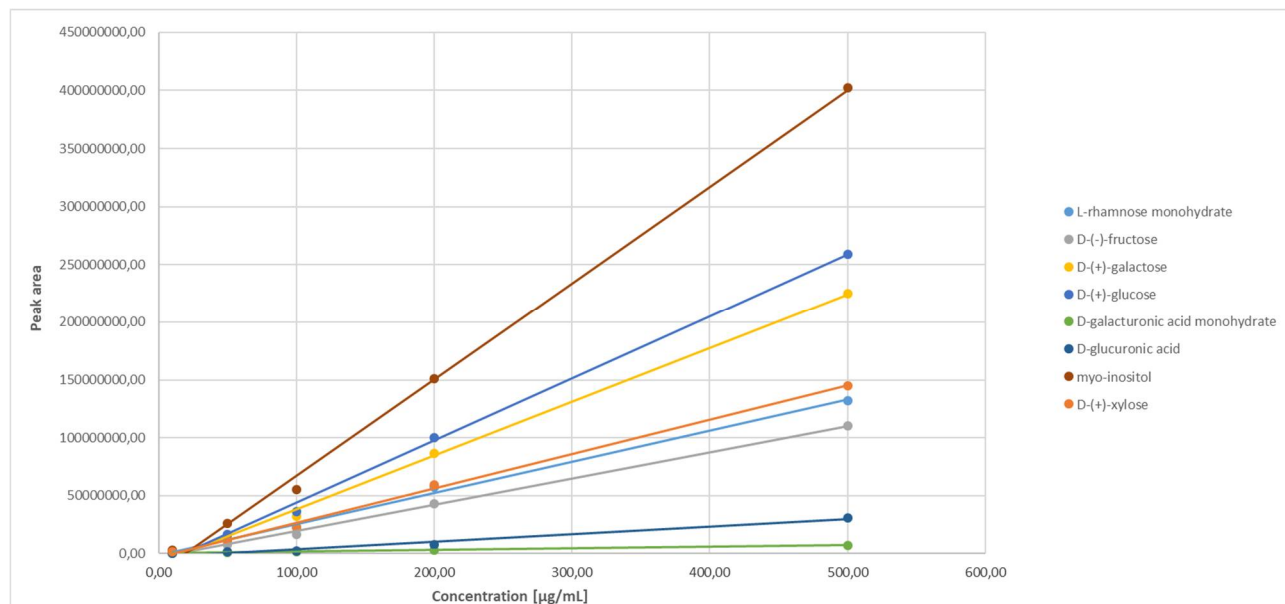

**Table S3.** Analytical characteristics of the GC-MS method used for quantification of carbohydrates.

| <b>Carbohydrate<br/>standard</b> | Linear range<br>( $\mu\text{g mL}^{-1}$ ) | Calibration curve equation<br>$y=(a\pm\text{SD})x+(b\pm\text{SD}), n=3$ | $R^2$ | $CV$<br>(%) | $LOD$<br>( $\mu\text{g mL}^{-1}$ ) | $LOQ$<br>( $\mu\text{g mL}^{-1}$ ) |
|----------------------------------|-------------------------------------------|-------------------------------------------------------------------------|-------|-------------|------------------------------------|------------------------------------|
| L-rhamnose monohydrate           | 10-500                                    | $y=(267989\pm8414)x-(1000000\pm1208906)$                                | 0.997 | 12.73       | 0.014                              | 0.048                              |
| D-(+)-xylose                     | 10-500                                    | $y=(296830\pm7543)x-(3000000\pm2000000)$                                | 0.998 | 6.19        | 0.009                              | 0.031                              |
| D-(-)-fructose                   | 10-500                                    | $y=(296830\pm88007)x-(3000000\pm2000000)$                               | 0.998 | 10.12       | 0.014                              | 0.046                              |
| D-(+)-galactose                  | 10-500                                    | $y = (464377\pm8946)x - (8000000\pm2000000)$                            | 0.998 | 1.86        | 0.002                              | 0.008                              |
| D-(+)-glucose                    | 10-500                                    | $y = (536016\pm9780)x - (9000000\pm1527525)$                            | 0.998 | 2.03        | 0.002                              | 0.008                              |
| D-galacturonic acid monohydrate  | 10-500                                    | $y = (14120\pm836)x + (14094\pm29916)$                                  | 0.999 | 13.02       | 0.393                              | 1.309                              |
| D-glucuronic acid                | 10-500                                    | $y = (59686\pm5028)x - (2000000\pm577350)$                              | 0.990 | 3.13        | 0.059                              | 0.195                              |
| <i>myo</i> -inositol             | 10-500                                    | $y = (830946\pm13513)x - (20000000\pm5773503)$                          | 0.998 | 1.51        | 0.001                              | 0.005                              |

$R^2$  – coefficient of determination;  $CV$  – coefficient of variation;  $LOD$  – limit of the determination;  $LOQ$  – limit of the quantification.



**Table S4.** Qualitative and quantitative (mean percentage content) carbohydrate composition of exopolysaccharide of three *R. leguminosarum* bv. *trifolii* strains isolated from root nodules of *T. repens* growing on 100-yr old Zn-Pb waste heap Bolesław (4.1H, 5.2H, 7.2H) and four non-polluted reference grassland Bolestraszyce ones (3.9K, 4.4K, 5.10K, 8.8K) not exposed (control) and exposed to 0.05 mM and 1.0 mM Cd, 0.5 mM and 2.5 mM Zn and 0.5 mM and 2.5 mM Pb.

| Carbohydrate               | 4.4K                    |              |              |              | 3.9K        |              |        |              | 8.8K        |              |              |              | 5.10K       |             |       |             | 7.2H        |             |              |              | 4.1H        |              |              |              | 5.2H       |              |              |         |      |
|----------------------------|-------------------------|--------------|--------------|--------------|-------------|--------------|--------|--------------|-------------|--------------|--------------|--------------|-------------|-------------|-------|-------------|-------------|-------------|--------------|--------------|-------------|--------------|--------------|--------------|------------|--------------|--------------|---------|------|
|                            | C                       | Cd           | Zn           | Pb           | C           | Cd           | Zn     | Pb           | C           | Cd           | Zn           | Pb           | C           | Cd          | Zn    | Pb          | C           | Cd          | Zn           | Pb           | C           | Cd           | Zn           | Pb           | C          | Cd           | Zn           | Pb      |      |
|                            | 1.0                     | 2.5          | 2.5          |              | 1.0         | 2.5          | 2.5    |              | 1.0         | 2.5          | 2.5          |              | 1.0         | 2.5         | 2.5   |             | 1.0         | 2.5         | 2.5          |              | 1.0         | 2.5          | 2.5          |              | 1.0        | 2.5          | 2.5          |         |      |
| α-D,L-lyxopyranose         | -                       | -            | -            | -            | -           | -            | -      | -            | -           | -            | -            | -            | -           | -           | -     | -           | -           | -           | -            | -            | 0.25        | -            | -            | -            | -          | -            | -            | -       |      |
| α-D-arabinopyranose        | -                       | -            | -            | -            | -           | -            | -      | -            | -           | -            | -            | -            | -           | 0.04        | -     | -           | -           | -           | -            | -            | -           | -            | -            | -            | -          | -            | -            | -       |      |
| D-rhamnose                 | -                       | -            | -            | -            | -           | -            | -      | -            | -           | -            | -            | -            | -           | -           | -     | -           | -           | -           | -            | -            | -           | -            | -            | -            | -          | -            | -            | -       |      |
| L-rhamnose monohydrate     | -                       | -            | -            | -            | -           | -            | -      | -            | -           | -            | -            | -            | -           | -           | -     | -           | -           | -           | -            | -            | -           | -            | -            | -            | -          | -            | -            | -       |      |
| levoglucosan               | 1.34±0.21               | -            | -            | -            | -           | 0.99         | -      | -            | -           | -            | -            | -            | -           | -           | -     | -           | -           | -           | -            | -            | -           | -            | -            | -            | -          | -            | -            | -       |      |
| 6-deoxy-D-glucose          | -                       | -            | -            | -            | 4.82        | -            | -      | -            | 3.12±0.18a  | -            | -            | -            | -           | -           | -     | -           | -           | -           | -            | -            | 3.13±0.74a  | -            | -            | -            | 2.19       | -            | -            | -       |      |
| methyl α-D-mannopyranoside | -                       | 1.05±0.37    | 1.02         | 1.95±0.21    | 0.30        | 1.55±0.07    | -      | 1.87±0.15    | 0.17        | 1.64±0.46    | 0.19         | 1.77±0.40a   | -           | 1.20±0.90a  | -     | 2.06±0.20a  | -           | 1.12±0.09   | 0.10         | 1.70±1.17    | 0.18±0.01   | 1.18±0.05    | -            | 2.82±1.33    | -          | 1.19±0.06    | 0.07         | 2.07a   |      |
| galactofuranoside          | 1.28                    | -            | -            | -            | 0.50        | -            | -      | -            | 0.31        | -            | -            | -            | -           | -           | -     | -           | -           | -           | -            | -            | 0.32±0.06   | -            | -            | -            | 0.26       | -            | -            | -       |      |
| α-D-mannopyranose          | 1.28±0.12               | 0.05±0.01a   | -            | 0.10±0.01a   | -           | 0.06±0.01a   | -      | 0.10±0.01a   | -           | 0.7          | -            | 0.11         | -           | 0.09        | -     | 0.10        | 0           | -           | 0.07±0.01a   | -            | 0.09±0.03   | -            | 0.05±0.01a   | -            | 0.13±0.06  | -            | 0.09±0.02a   | -       |      |
| D-fructose                 | -                       | 0.22±0.06b   | 0.16         | 0.15±0.04b   | 1.44        | 0.08±0.04a   | -      | 0.10±0.01a   | 1.07±0.02b  | 0.16         | -            | 0.08         | -           | 0.10        | -     | 0.10±0.01   | -           | -           | -            | 0.11         | 0.08±0.04   | 1.40±0.11b   | -            | 0.11         | 0          | 0.15±0.13    | 0.95         | -       | 0.09 |
| β-D-galactopyranoside      | 1.15                    | -            | -            | -            | -           | -            | -      | -            | 0.17        | -            | -            | -            | -           | 0.24        | -     | -           | -           | -           | -            | -            | 0.18±0.06   | -            | -            | -            | 0.21       | -            | -            | -       |      |
| α-D-galactofuranose        | -                       | -            | -            | -            | -           | -            | -      | -            | -           | -            | -            | -            | -           | -           | -     | -           | -           | -           | -            | -            | -           | -            | -            | -            | -          | -            | -            |         |      |
| α-D-mannofuranose          | -                       | -            | -            | -            | -           | -            | -      | -            | -           | -            | -            | -            | -           | -           | -     | -           | -           | -           | -            | -            | -           | -            | -            | -            | -          | -            | -            |         |      |
| α-glucofuranose            | 0.47 <sup>a</sup>       | -            | -            | -            | 0.65        | -            | -      | -            | 0.36        | -            | -            | -            | -           | -           | -     | -           | -           | -           | -            | -            | 0.45        | -            | -            | -            | 0.49       | -            | -            | -       |      |
| D-galactose                | -                       | -            | -            | -            | -           | -            | -      | -            | 15.09±0.24c | -            | -            | -            | -           | -           | -     | -           | -           | -           | -            | -            | 14.79±0.90c | -            | -            | -            | 11.71a     | -            | -            | -       |      |
| α-D-glucopyranoside        | 6.53±0.99 <sup>b</sup>  | 0.18±0.01b   | 0.26         | 0.28±0.01c   | 3.61        | 0.17±0.03b   | -      | 0.29±0.04b   | 0.38±0.24   | 0.23±0.02a   | 0.38         | 0.24±0.03b   | 3.99        | 0.28±0.23   | -     | 0.26±0.01b  | 5.04±0.16   | 0.39±0.27   | -            | 0.20±0.07    | 0.32±0.15   | 0.32±0.25a   | -            | 0.31±0.11    | 4.70±0.49b | 0.29±0.11a   | -            | 0.59    |      |
| α-D-glucopyranose          | -                       | -            | -            | -            | 4.33        | -            | -      | -            | 4.63±0.01a  | -            | -            | -            | -           | -           | -     | -           | -           | -           | -            | -            | 4.72±0.23a  | -            | -            | -            | 3.75b      | -            | -            | -       |      |
| D-glucose                  | 0.77                    | -            | -            | -            | 4.71        | -            | -      | -            | 5.17±0.31a  | -            | -            | -            | -           | -           | -     | -           | -           | -           | -            | -            | 4.19±0.09a  | -            | -            | -            | 3.35b      | -            | -            | -       |      |
| β-D-galactopyranose        | -                       | 0.06±0.01a   | -            | 0.07a        | 0.25        | 0.07±0.01a   | -      | 0.08±0.01a   | 0.28±0.04   | 0.08±0.01    | -            | 0.08         | -           | 0.15        | -     | 0.08±0.01a  | -           | 0.12±0.06a  | -            | 0.06±0.01    | 0.22        | 0.11±0.02a   | -            | 0.09±0.02    | -          | 0.16±0.04a   | -            | 0.17    |      |
| β-D-mannopyranose          | -                       | -            | -            | -            | -           | -            | -      | -            | -           | -            | -            | -            | -           | -           | -     | -           | -           | -           | -            | -            | -           | -            | -            | -            | -          | -            | -            |         |      |
| β-talopyranose             | -                       | -            | -            | -            | -           | -            | -      | -            | -           | -            | -            | -            | -           | -           | -     | -           | -           | 0.34        | -            | -            | -           | 0.36a        | -            | -            | -          | 0.29         | -            | 0.10    |      |
| sedoheptulose              | -                       | 1.60±0.90    | -            | -            | 0.47        | 4.04±2.93c   | -      | -            | 0.53±0.04   | 2.26±1.36*   | -            | -            | -           | 7.02±5.57b  | -     | 0.74a       | -           | 8.23±0.93b  | -            | -            | 0.58±0.04   | 8.49±1.02b*  | -            | -            | 0.59       | 9.19±0.19b*  | 0.46a        | -       |      |
| glucitol                   | 79.78±3.49 <sup>c</sup> | 96.48±0.39c* | 98.41±0.98a* | 97.05±0.19d* | 84.96±5.93a | 93.60±2.97d* | 99.41* | 97.16±0.13c* | 67.70±1.27d | 95.34±2.06b* | 99.26±0.05a* | 97.48±0.67c* | 95.49±6.39a | 90.68±4.07c | 99.52 | 96.64±0.28c | 89.68±1.99a | 89.58±1.37c | 99.52±0.08a* | 97.53±1.34*a | 67.46±2.34d | 92.18±1.18c* | 99.55±0.03a* | 96.21±1.61*a | 77.61±11c  | 93.18±2.32c* | 99.32±0.21b* | 96.59b* |      |
| β-D-glucopyranose          | 7.28±0.78 <sup>b</sup>  | -            | -            | -            | 3.37±4.06   | -            | -      | -            | 0.65±0.40   | -            | -            | -            | 5.04        | -           | -     | -           | 5.29±1.82   | -           | -            | 0.50±0.12    | -           | -            | -            | 4.32±3.12    | -          | -            | -            | -       |      |
| galactonic acid            | -                       | -            | -            | -            | -           | -            | -      | -            | -           | -            | -            | -            | -           | -           | -     | -           | -           | -           | -            | -            | -           | -            | -            | -            | -          | -            | -            | -       |      |
| gluconic acid              | 1.05±0.25               | -            | -            | -            | -           | -            | -      | -            | -           | -            | -            | -            | -           | -           | -     | -           | -           | -           | -            | -            | -           | -            | -            | -            | -          | -            | -            | -       |      |
| glucuronic acid            | -                       | -            | -            | -            | -           | -            | -      | -            | -           | -            | -            | -            | -           | -           | -     | -           | -           | -           | -            | -            | -           | -            | -            | -            | -          | -            | -            | -       |      |
| D-glucuronic acid          | -                       | -            | -            | -            | -           | -            | -      | -            | -           | -            | -            | -            | -           | -           | -     | -           | -           | -           | -            | -            | -           | -            | -            | -            | -          | -            | -            | -       |      |



**Table S5.** Mean percentage of living and dead cells in biofilms formed by *R. leguminosarum* bv. *trifolii* isolated from root nodules of *T. repens* growing on 100-yr old Zn-Pb waste heap Bolesław (H) and non-polluted reference grassland Bolestraszyce (K), not exposed (control) and exposed to 0.05 mM and 1.0 mM Cd, 0.5 mM and 2.5 mM Zn and 0.5 mM and 2.5 mM Pb.

| Rhizobia strain | control                 |                         | Cd 0.05                 |                         | Cd 1.0                    |                           | Zn 0.5                  |                         | Zn 2.5                   |                          | Pb 0.5                  |                         | Pb 2.5                   |                          |
|-----------------|-------------------------|-------------------------|-------------------------|-------------------------|---------------------------|---------------------------|-------------------------|-------------------------|--------------------------|--------------------------|-------------------------|-------------------------|--------------------------|--------------------------|
|                 | L                       | D                       | L                       | D                       | L                         | D                         | L                       | D                       | L                        | D                        | L                       | D                       | L                        | D                        |
| 8.8K            | 76.16±1.70 <sup>a</sup> | 23.84±1.70 <sup>a</sup> | 66.72±2.16 <sup>a</sup> | 33.28±2.16 <sup>a</sup> | 27.27±4.80 <sup>a</sup>   | 72.73±4.80 <sup>a</sup>   | 24.01±1.55 <sup>a</sup> | 75.99±1.55 <sup>a</sup> | 34.29±4.72 <sup>a</sup>  | 65.71±4.72 <sup>a</sup>  | 68.60±3.46 <sup>a</sup> | 31.40±3.46 <sup>a</sup> | 32.31±5.14 <sup>a</sup>  | 67.69±5.14 <sup>a</sup>  |
| 4.4K            | 74.60±2.06 <sup>a</sup> | 25.40±2.06 <sup>a</sup> | 72.05±2.32 <sup>a</sup> | 27.95±2.32 <sup>a</sup> | 48.88±1.16 <sup>b</sup>   | 51.12±1.16 <sup>b</sup>   | 43.58±2.05 <sup>b</sup> | 56.42±2.05 <sup>b</sup> | 57.62±1.66 <sup>b</sup>  | 42.38±1.66 <sup>b</sup>  | 78.94±1.48 <sup>b</sup> | 21.06±1.48 <sup>b</sup> | 44.35±1.46 <sup>b</sup>  | 55.65±1.46 <sup>b</sup>  |
| 3.9K            | 71.57±0.49 <sup>a</sup> | 28.43±0.49 <sup>a</sup> | 59.69±1.60 <sup>b</sup> | 41.31±1.60 <sup>b</sup> | 18.50±0.62 <sup>c</sup>   | 81.50±0.62 <sup>c</sup>   | 27.71±2.97 <sup>a</sup> | 72.29±2.97 <sup>a</sup> | 22.15±5.03 <sup>a</sup>  | 77.85±5.03 <sup>a</sup>  | 61.98±3.33 <sup>a</sup> | 38.02±3.53 <sup>a</sup> | 26.56±3.49 <sup>a</sup>  | 73.44±3.49 <sup>a</sup>  |
| 5.10K           | 76.46±1.85 <sup>a</sup> | 23.54±1.85 <sup>a</sup> | 69.82±2.16 <sup>a</sup> | 31.28±2.16 <sup>a</sup> | 27.27±4.80 <sup>a</sup>   | 72.73±4.80 <sup>a</sup>   | 24.01±1.55 <sup>a</sup> | 75.99±1.55 <sup>a</sup> | 34.29±4.72 <sup>a</sup>  | 65.71±4.72 <sup>a</sup>  | 68.60±3.46 <sup>a</sup> | 31.40±3.46 <sup>a</sup> | 32.31±5.14 <sup>a</sup>  | 67.69±5.14 <sup>a</sup>  |
| $\bar{X}_K$     | 75.65±2.74              | 22.35±2.74              | 67.50±1.67 <sup>#</sup> | 32.50±1.67 <sup>#</sup> | 25.83±5.79 <sup>##</sup>  | 75.17±5.79 <sup>##</sup>  | 26.39±3.68 <sup>#</sup> | 73.61±3.68 <sup>#</sup> | 26.67±5.97 <sup>#</sup>  | 73.33±5.97 <sup>#</sup>  | 72.26±8.79 <sup>#</sup> | 27.24±8.79 <sup>#</sup> | 29.97±2.69 <sup>##</sup> | 71.03±2.69 <sup>##</sup> |
| 5.2H            | 72.36±6.02 <sub>a</sub> | 24.64±6.02 <sub>a</sub> | 82.44±3.19 <sub>a</sub> | 17.56±3.19 <sub>a</sub> | 61.24±2.47 <sub>a</sub>   | 38.76±2.47 <sub>a</sub>   | 80.84±2.08 <sub>a</sub> | 19.16±2.08 <sub>a</sub> | 34.05±2.54 <sub>a</sub>  | 65.95±2.54 <sub>a</sub>  | 82.77±2.58 <sub>a</sub> | 17.23±2.58 <sub>a</sub> | 36.28±1.33 <sub>a</sub>  | 64.72±1.33 <sub>a</sub>  |
| 7.2H            | 75.04±3.63 <sub>a</sub> | 24.96±3.63 <sub>a</sub> | 73.10±4.11 <sub>b</sub> | 26.90±4.11 <sub>b</sub> | 54.47±3.49 <sub>b</sub>   | 45.53±3.49 <sub>b</sub>   | 72.49±3.09 <sub>b</sub> | 27.51±3.09 <sub>b</sub> | 57.83±3.85 <sub>b</sub>  | 43.17±3.35 <sub>b</sub>  | 78.36±3.15 <sub>a</sub> | 21.64±3.15 <sub>a</sub> | 42.28±1.58 <sub>b</sub>  | 57.72±1.58 <sub>b</sub>  |
| 4.1H            | 76.15±3.03 <sub>a</sub> | 24.85±3.03 <sub>a</sub> | 68.28±0.67 <sub>b</sub> | 31.72±0.67 <sub>b</sub> | 30.39±1.24 <sub>c</sub>   | 70.61±1.24 <sub>c</sub>   | 28.77±3.81 <sub>c</sub> | 71.23±3.81 <sub>c</sub> | 29.05±1.16 <sub>c</sub>  | 70.95±1.16 <sub>c</sub>  | 82.25 <sub>a</sub>      | 14.75 <sub>a</sub>      | 33.63±0.21 <sub>c</sub>  | 67.37±0.21 <sub>c</sub>  |
| $\bar{X}_H$     | 75.00±3.68              | 25.00±3.68              | 75.86±5.72 <sup>*</sup> | 24.14±5.72 <sup>*</sup> | 54.86±5.80 <sup>*##</sup> | 45.14±5.80 <sup>*##</sup> | 75.63±9.47 <sup>*</sup> | 24.37±9.47 <sup>*</sup> | 46.50±4.50 <sup>*#</sup> | 53.50±4.50 <sup>*#</sup> | 80.02±3.00              | 19.98±3.00              | 36.63±3.14 <sup>*#</sup> | 63.37±3.14 <sup>*#</sup> |

Results are presented as means ± SD for n= (2-8), analyzed with one-way analysis of variance (ANOVA), and significant differences between means were estimated with the usage of the multiple range Duncan's. Abbreviations:  $\bar{X}_K$  – mean living and dead cells of rhizobial non-polluted reference origin group,  $\bar{X}_H$  – mean living and dead cells of rhizobial waste heap origin group. Asterisk is used to mark significance of differences between non-polluted reference and waste heap origin strains, letters in upper case are used to mark significance of differences among rhizobia of non-polluted reference origin, letters in lower case are used to indicate significance of differences among waste heap area origin ones, number sign is used to indicate the significance of differences between control and two doses of particular metal *i.e.*, Cd 0.05 *vs.* Cd 1.0, Zn 0.5 *vs.* Zn 2.5, and Pb 0.5 *vs.* Pb 2.5 groups. Density of colours proportional with an increase of dye-labelled cells was used to mark differences in living cell amounts (green) and dead ones (red) of non-polluted reference origin *R. leguminosarum* bv. *trifolii* strains (K) and waste heap ones (H).
